# Supplementary material for: Reactions of Cp2M (M = Ni, V) with dilithium diamido-aryl reagents; retention and oxidation of the transition metal ions
Source: Royal Society of Chemistry journal article supplement (doi:10.1039/c3dt51632f), 2013-01-01
Supplement: c3dt51632f.pdf [file c3dt51632f.pdf]

**Electronic Supplementary Data**

***Dalton Transactions***

**Reactions of Cp<sub>2</sub>M (M = Ni, V) with Dilithium Diamido-aryl Reagents; Retention and Oxidation of the Transition Metal Ions**

Francesca A. Stokes,<sup>a</sup> Mark A. Vincent,<sup>b</sup> Ian H. Hillier,<sup>b</sup> Tanya K. Ronson,<sup>a</sup> Alexander Steiner,<sup>c</sup> Andrew E. H. Wheatley,<sup>\*a</sup> Paul T. Wood<sup>a</sup> and Dominic S. Wright<sup>\*a</sup>

<sup>a</sup>*Department of Chemistry, University of Cambridge, Lensfield Road, Cambridge, CB2 1EW, U.K.  
Fax: +44 (0)1223 336362; Tel: +44 (0)1223 763966; email: aehw2@cam.ac.uk, dsw1000@cam.ac.uk*

<sup>b</sup>*School of Chemistry, The University of Manchester, Manchester, M13 9PL, U.K.*

<sup>c</sup>*Department of Chemistry, University of Liverpool, Crown street, Liverpool, L69 7ZD, U.K.*

## Computational details

The coordinates of **5a** optimized at the M06-L/6-31+G\*\* level (no solvent model present).

|    |    |   |           |           |           |
|----|----|---|-----------|-----------|-----------|
| 1  | 6  | 0 | 0.042719  | -0.843341 | 3.490971  |
| 2  | 6  | 0 | 0.731241  | -1.904378 | 2.873483  |
| 3  | 6  | 0 | 0.880944  | -3.119599 | 3.539264  |
| 4  | 6  | 0 | 0.370048  | -3.270142 | 4.830572  |
| 5  | 6  | 0 | -0.308057 | -2.217675 | 5.442989  |
| 6  | 6  | 0 | -0.484444 | -1.006161 | 4.769593  |
| 7  | 7  | 0 | 1.206511  | -1.617964 | 1.576436  |
| 8  | 28 | 0 | 1.420892  | 0.299586  | 1.393690  |
| 9  | 7  | 0 | -0.047143 | 0.320533  | 2.688242  |
| 10 | 28 | 0 | -1.486895 | 0.283867  | 1.343884  |
| 11 | 7  | 0 | -1.442285 | 2.252914  | 1.285166  |
| 12 | 6  | 0 | -2.562621 | 2.900753  | 0.709325  |
| 13 | 6  | 0 | -2.559282 | 2.913851  | -0.698999 |
| 14 | 6  | 0 | -3.613244 | 3.506899  | -1.390699 |
| 15 | 6  | 0 | -4.652886 | 4.117346  | -0.684030 |
| 16 | 6  | 0 | -4.653471 | 4.107369  | 0.708913  |
| 17 | 6  | 0 | -3.615065 | 3.486192  | 1.407785  |
| 18 | 7  | 0 | -1.444582 | 2.268119  | -1.281408 |
| 19 | 28 | 0 | -0.000040 | 2.271440  | -0.000173 |
| 20 | 28 | 0 | 1.486530  | 0.282613  | -1.343972 |
| 21 | 7  | 0 | 2.829853  | 0.148104  | 0.049229  |
| 22 | 6  | 0 | 3.519390  | -1.079120 | -0.039576 |
| 23 | 6  | 0 | 2.821476  | -2.075488 | -0.742476 |
| 24 | 6  | 0 | 3.382158  | -3.343394 | -0.894473 |
| 25 | 6  | 0 | 4.650611  | -3.604092 | -0.370365 |
| 26 | 6  | 0 | 5.344176  | -2.611664 | 0.321556  |
| 27 | 6  | 0 | 4.775251  | -1.348381 | 0.499125  |
| 28 | 7  | 0 | 1.559508  | -1.663173 | -1.220338 |
| 29 | 28 | 0 | -0.000274 | -1.708945 | 0.000603  |
| 30 | 7  | 0 | -1.207019 | -1.619757 | -1.575672 |
| 31 | 6  | 0 | -0.731190 | -1.907206 | -2.872247 |
| 32 | 6  | 0 | -0.042557 | -0.846611 | -3.490379 |
| 33 | 6  | 0 | 0.485231  | -1.010483 | -4.768615 |
| 34 | 6  | 0 | 0.309360  | -2.222619 | -5.441011 |
| 35 | 6  | 0 | -0.368891 | -3.274647 | -4.827976 |
| 36 | 6  | 0 | -0.880371 | -3.123063 | -3.537030 |
| 37 | 7  | 0 | 0.046891  | 0.317952  | -2.688646 |
| 38 | 28 | 0 | -1.420792 | 0.297909  | -1.393685 |
| 39 | 7  | 0 | -2.830023 | 0.147833  | -0.049203 |
| 40 | 6  | 0 | -3.519533 | -1.079267 | 0.040519  |
| 41 | 6  | 0 | -2.821524 | -2.075090 | 0.744091  |
| 42 | 6  | 0 | -3.382019 | -3.342972 | 0.896857  |
| 43 | 6  | 0 | -4.650433 | -3.604175 | 0.372876  |
| 44 | 6  | 0 | -5.344102 | -2.612280 | -0.319694 |
| 45 | 6  | 0 | -4.775360 | -1.349017 | -0.498015 |
| 46 | 7  | 0 | -1.559591 | -1.662231 | 1.221695  |
| 47 | 7  | 0 | 1.444996  | 2.269930  | 1.280444  |
| 48 | 6  | 0 | 2.559446  | 2.914840  | 0.696739  |
| 49 | 6  | 0 | 2.562159  | 2.900055  | -0.711575 |
| 50 | 6  | 0 | 3.614342  | 3.484423  | -1.411276 |
| 51 | 6  | 0 | 4.653190  | 4.106308  | -0.713675 |
| 52 | 6  | 0 | 4.653239  | 4.118006  | 0.679256  |
| 53 | 6  | 0 | 3.613842  | 3.508625  | 1.387186  |
| 54 | 7  | 0 | 1.441426  | 2.251620  | -1.286127 |
| 55 | 1  | 0 | 3.612754  | 3.464084  | -2.499149 |

|    |   |   |           |           |           |
|----|---|---|-----------|-----------|-----------|
| 56 | 1 | 0 | 5.460516  | 4.581780  | -1.262620 |
| 57 | 1 | 0 | 5.460381  | 4.602854  | 1.220233  |
| 58 | 1 | 0 | 3.610187  | 3.508405  | 2.475338  |
| 59 | 1 | 0 | -3.609035 | 3.505307  | -2.478847 |
| 60 | 1 | 0 | -5.459695 | 4.601668  | -1.225975 |
| 61 | 1 | 0 | -5.460965 | 4.583654  | 1.256900  |
| 62 | 1 | 0 | -3.614000 | 3.467251  | 2.495686  |
| 63 | 1 | 0 | 2.835491  | -4.111523 | -1.437719 |
| 64 | 1 | 0 | 5.098393  | -4.583716 | -0.509928 |
| 65 | 1 | 0 | 6.332465  | -2.817344 | 0.722480  |
| 66 | 1 | 0 | 5.308227  | -0.568321 | 1.038648  |
| 67 | 1 | 0 | 1.412273  | -3.934205 | 3.051381  |
| 68 | 1 | 0 | 0.507661  | -4.209879 | 5.357567  |
| 69 | 1 | 0 | -0.701864 | -2.335468 | 6.448351  |
| 70 | 1 | 0 | -1.018805 | -0.184487 | 5.242340  |
| 71 | 1 | 0 | -5.308421 | -0.569372 | -1.038054 |
| 72 | 1 | 0 | -6.332352 | -2.818345 | -0.720520 |
| 73 | 1 | 0 | -5.098078 | -4.583779 | 0.513013  |
| 74 | 1 | 0 | -2.835258 | -4.110711 | 1.440557  |
| 75 | 1 | 0 | -1.411769 | -3.937332 | -3.048665 |
| 76 | 1 | 0 | -0.506089 | -4.214875 | -5.354202 |
| 77 | 1 | 0 | 0.703653  | -2.341256 | -6.446081 |
| 78 | 1 | 0 | 1.019686  | -0.189142 | -5.241829 |
| 79 | 1 | 0 | -1.277004 | 2.633511  | -2.215673 |
| 80 | 1 | 0 | -1.269506 | 2.627100  | 2.215553  |
| 81 | 1 | 0 | -0.174479 | 1.136136  | 3.285168  |
| 82 | 1 | 0 | 2.015402  | -2.203561 | 1.370994  |
| 83 | 1 | 0 | -2.015994 | -2.205140 | -1.369986 |
| 84 | 1 | 0 | 0.173973  | 1.133151  | -3.286168 |
| 85 | 1 | 0 | -3.489985 | 0.914496  | -0.173403 |
| 86 | 1 | 0 | -1.306011 | -2.208310 | 2.043944  |
| 87 | 1 | 0 | 1.278434  | 2.635710  | 2.214729  |
| 88 | 1 | 0 | 1.267606  | 2.625510  | -2.216450 |
| 89 | 1 | 0 | 1.306006  | -2.209817 | -2.042223 |
| 90 | 1 | 0 | 3.490000  | 0.914803  | 0.172235  |

The coordinates of **5a** optimized at the M06L/6-31+G\*\*with DMSO included via the SMD approach.

|    |    |   |           |           |           |
|----|----|---|-----------|-----------|-----------|
| 1  | 6  | 0 | 0.043954  | 0.832934  | -3.485259 |
| 2  | 6  | 0 | 0.725474  | 1.904674  | -2.874009 |
| 3  | 6  | 0 | 0.866062  | 3.118189  | -3.546258 |
| 4  | 6  | 0 | 0.351735  | 3.258371  | -4.839081 |
| 5  | 6  | 0 | -0.317674 | 2.195521  | -5.446377 |
| 6  | 6  | 0 | -0.482951 | 0.983849  | -4.767204 |
| 7  | 7  | 0 | 1.205981  | 1.628016  | -1.577970 |
| 8  | 28 | 0 | 1.422360  | -0.292874 | -1.384111 |
| 9  | 7  | 0 | -0.037846 | -0.324842 | -2.679228 |
| 10 | 28 | 0 | -1.485475 | -0.282204 | -1.344348 |
| 11 | 7  | 0 | -1.438194 | -2.246907 | -1.286200 |
| 12 | 6  | 0 | -2.552795 | -2.897329 | -0.708765 |
| 13 | 6  | 0 | -2.548083 | -2.909941 | 0.702018  |
| 14 | 6  | 0 | -3.594572 | -3.514951 | 1.396639  |
| 15 | 6  | 0 | -4.630897 | -4.134306 | 0.690062  |
| 16 | 6  | 0 | -4.633742 | -4.124357 | -0.704483 |
| 17 | 6  | 0 | -3.600591 | -3.494638 | -1.406873 |
| 18 | 7  | 0 | -1.438878 | -2.259242 | 1.282392  |
| 19 | 28 | 0 | 0.000065  | -2.250773 | -0.000106 |
| 20 | 28 | 0 | 1.485512  | -0.282442 | 1.344354  |
| 21 | 7  | 0 | 2.840669  | -0.147017 | -0.041486 |
| 22 | 6  | 0 | 3.524638  | 1.080537  | 0.042589  |
| 23 | 6  | 0 | 2.823280  | 2.080303  | 0.741784  |
| 24 | 6  | 0 | 3.383024  | 3.350377  | 0.888853  |
| 25 | 6  | 0 | 4.651772  | 3.612704  | 0.362331  |
| 26 | 6  | 0 | 5.348207  | 2.617784  | -0.325650 |
| 27 | 6  | 0 | 4.781784  | 1.350707  | -0.496238 |
| 28 | 7  | 0 | 1.563983  | 1.669455  | 1.222229  |
| 29 | 28 | 0 | -0.000023 | 1.706875  | 0.000097  |
| 30 | 7  | 0 | -1.205948 | 1.627620  | 1.578115  |
| 31 | 6  | 0 | -0.725506 | 1.904130  | 2.874225  |
| 32 | 6  | 0 | -0.044001 | 0.832331  | 3.485386  |
| 33 | 6  | 0 | 0.482839  | 0.983116  | 4.767376  |
| 34 | 6  | 0 | 0.317522  | 2.194716  | 5.446665  |
| 35 | 6  | 0 | -0.351876 | 3.257622  | 4.839454  |
| 36 | 6  | 0 | -0.866149 | 3.117566  | 3.546595  |
| 37 | 7  | 0 | 0.037866  | -0.325343 | 2.679212  |
| 38 | 28 | 0 | -1.422415 | -0.293266 | 1.384177  |
| 39 | 7  | 0 | -2.840652 | -0.147124 | 0.041515  |
| 40 | 6  | 0 | -3.524679 | 1.080420  | -0.042377 |
| 41 | 6  | 0 | -2.823401 | 2.080323  | -0.741465 |
| 42 | 6  | 0 | -3.383244 | 3.350369  | -0.888401 |
| 43 | 6  | 0 | -4.652005 | 3.612547  | -0.361844 |
| 44 | 6  | 0 | -5.348357 | 2.617503  | 0.326045  |
| 45 | 6  | 0 | -4.781837 | 1.350450  | 0.496497  |
| 46 | 7  | 0 | -1.564090 | 1.669640  | -1.221998 |
| 47 | 7  | 0 | 1.438977  | -2.258858 | -1.282648 |
| 48 | 6  | 0 | 2.548230  | -2.909650 | -0.702461 |
| 49 | 6  | 0 | 2.552972  | -2.897400 | 0.708328  |
| 50 | 6  | 0 | 3.600795  | -3.494879 | 1.406255  |
| 51 | 6  | 0 | 4.633940  | -4.124394 | 0.703676  |

|    |   |   |           |           |           |
|----|---|---|-----------|-----------|-----------|
| 52 | 6 | 0 | 4.631074  | -4.133969 | -0.690872 |
| 53 | 6 | 0 | 3.594725  | -3.514439 | -1.397263 |
| 54 | 7 | 0 | 1.438378  | -2.247152 | 1.285964  |
| 55 | 1 | 0 | 3.593903  | -3.483867 | 2.494337  |
| 56 | 1 | 0 | 5.437174  | -4.610950 | 1.250251  |
| 57 | 1 | 0 | 5.432292  | -4.627249 | -1.234382 |
| 58 | 1 | 0 | 3.582572  | -3.517207 | -2.485395 |
| 59 | 1 | 0 | -3.582444 | -3.518003 | 2.484771  |
| 60 | 1 | 0 | -5.432121 | -4.627736 | 1.233429  |
| 61 | 1 | 0 | -5.436963 | -4.610778 | -1.251198 |
| 62 | 1 | 0 | -3.593679 | -3.483333 | -2.494952 |
| 63 | 1 | 0 | 2.834759  | 4.119371  | 1.430012  |
| 64 | 1 | 0 | 5.096851  | 4.594852  | 0.497082  |
| 65 | 1 | 0 | 6.336587  | 2.823647  | -0.727901 |
| 66 | 1 | 0 | 5.317514  | 0.567204  | -1.028723 |
| 67 | 1 | 0 | 1.392440  | 3.939116  | -3.062947 |
| 68 | 1 | 0 | 0.480891  | 4.197316  | -5.370904 |
| 69 | 1 | 0 | -0.711012 | 2.303730  | -6.453758 |
| 70 | 1 | 0 | -1.002520 | 0.151005  | -5.236824 |
| 71 | 1 | 0 | -5.317509 | 0.566853  | 1.028899  |
| 72 | 1 | 0 | -6.336747 | 2.823249  | 0.728329  |
| 73 | 1 | 0 | -5.097163 | 4.594672  | -0.496497 |
| 74 | 1 | 0 | -2.835043 | 4.119455  | -1.429495 |
| 75 | 1 | 0 | -1.392509 | 3.938539  | 3.063342  |
| 76 | 1 | 0 | -0.481060 | 4.196513  | 5.371364  |
| 77 | 1 | 0 | 0.710820  | 2.302828  | 6.454073  |
| 78 | 1 | 0 | 1.002405  | 0.150233  | 5.236930  |
| 79 | 1 | 0 | -1.263649 | -2.614801 | 2.220140  |
| 80 | 1 | 0 | -1.262875 | -2.610831 | -2.221046 |
| 81 | 1 | 0 | -0.156977 | -1.149902 | -3.265661 |
| 82 | 1 | 0 | 1.999012  | 2.236251  | -1.374701 |
| 83 | 1 | 0 | -1.999050 | 2.235808  | 1.374976  |
| 84 | 1 | 0 | 0.157009  | -1.150475 | 3.265547  |
| 85 | 1 | 0 | -3.504586 | -0.908822 | 0.176906  |
| 86 | 1 | 0 | -1.306633 | 2.235228  | -2.030033 |
| 87 | 1 | 0 | 1.263647  | -2.614312 | -2.220416 |
| 88 | 1 | 0 | 1.263200  | -2.611182 | 2.220794  |
| 89 | 1 | 0 | 1.306475  | 2.234906  | 2.030344  |
| 90 | 1 | 0 | 3.504619  | -0.908652 | -0.177132 |

The coordinates of **5b**<sup>2-</sup> at the M06-L/6-31+G\*\* level (the one THF solvent molecule bound to Li is included, but no other solvent effects are included).

|    |    |   |           |           |           |
|----|----|---|-----------|-----------|-----------|
| 1  | 6  | 0 | 5.155244  | 1.722450  | 0.887467  |
| 2  | 8  | 0 | 4.767379  | 0.629407  | 1.724770  |
| 3  | 6  | 0 | 5.459608  | -0.525076 | 1.231177  |
| 4  | 6  | 0 | 5.715463  | -0.289934 | -0.263963 |
| 5  | 6  | 0 | 5.192192  | 1.131969  | -0.508785 |
| 6  | 3  | 0 | 2.655062  | 0.331819  | 1.586196  |
| 7  | 7  | 0 | 0.892007  | 0.051846  | 2.327160  |
| 8  | 6  | 0 | 0.085761  | -0.085194 | 3.429660  |
| 9  | 6  | 0 | -1.220681 | 0.483367  | 3.358359  |
| 10 | 6  | 0 | -2.075689 | 0.476715  | 4.458908  |
| 11 | 6  | 0 | -1.664727 | -0.112286 | 5.662582  |
| 12 | 6  | 0 | -0.410560 | -0.727688 | 5.732132  |
| 13 | 6  | 0 | 0.444413  | -0.735565 | 4.628885  |
| 14 | 7  | 0 | -1.522938 | 0.982554  | 2.080329  |
| 15 | 28 | 0 | 0.148948  | 1.405662  | 1.185103  |
| 16 | 7  | 0 | 1.918473  | 1.698209  | 0.370422  |
| 17 | 6  | 0 | 2.070958  | 2.866677  | -0.318584 |
| 18 | 6  | 0 | 1.648203  | 2.904944  | -1.688223 |
| 19 | 6  | 0 | 1.873592  | 4.020191  | -2.489243 |
| 20 | 6  | 0 | 2.498392  | 5.159287  | -1.959408 |
| 21 | 6  | 0 | 2.840441  | 5.179088  | -0.604889 |
| 22 | 6  | 0 | 2.606058  | 4.067140  | 0.208374  |
| 23 | 7  | 0 | 0.980666  | 1.729115  | -2.072113 |
| 24 | 28 | 0 | 1.610705  | 0.281894  | -0.916826 |
| 25 | 7  | 0 | 2.334818  | -1.065808 | 0.267516  |
| 26 | 6  | 0 | 2.777285  | -2.120871 | -0.481846 |
| 27 | 6  | 0 | 2.401042  | -2.160868 | -1.864422 |
| 28 | 6  | 0 | 2.936284  | -3.108639 | -2.734122 |
| 29 | 6  | 0 | 3.827000  | -4.082342 | -2.257677 |
| 30 | 6  | 0 | 4.119406  | -4.129206 | -0.891672 |
| 31 | 6  | 0 | 3.578383  | -3.187407 | -0.012927 |
| 32 | 7  | 0 | 1.435303  | -1.193866 | -2.179942 |
| 33 | 28 | 0 | -0.424054 | -1.437524 | -1.508794 |
| 34 | 7  | 0 | 0.110152  | -2.838666 | -0.245496 |
| 35 | 6  | 0 | -0.886168 | -3.670146 | 0.272904  |
| 36 | 6  | 0 | -1.644910 | -3.089846 | 1.320229  |
| 37 | 6  | 0 | -2.650896 | -3.836727 | 1.939017  |
| 38 | 6  | 0 | -2.892736 | -5.158789 | 1.550453  |
| 39 | 6  | 0 | -2.144431 | -5.730689 | 0.521836  |
| 40 | 6  | 0 | -1.151499 | -4.983443 | -0.122500 |
| 41 | 7  | 0 | -1.278650 | -1.784565 | 1.653277  |
| 42 | 28 | 0 | 0.586442  | -1.394480 | 1.059850  |
| 43 | 28 | 0 | -1.958058 | -0.259785 | 0.575301  |
| 44 | 28 | 0 | -0.852397 | 1.462194  | -1.361788 |
| 45 | 7  | 0 | -0.699898 | 2.837218  | -0.004472 |
| 46 | 6  | 0 | -1.945524 | 3.320723  | 0.384744  |
| 47 | 6  | 0 | -3.019341 | 2.447060  | 0.093290  |
| 48 | 6  | 0 | -4.323480 | 2.804941  | 0.431605  |
| 49 | 6  | 0 | -4.579065 | 4.041735  | 1.037566  |
| 50 | 6  | 0 | -3.521196 | 4.903987  | 1.326798  |

|     |   |   |           |           |           |
|-----|---|---|-----------|-----------|-----------|
| 51  | 6 | 0 | -2.206796 | 4.542638  | 1.011494  |
| 52  | 7 | 0 | -2.626914 | 1.254568  | -0.531889 |
| 53  | 7 | 0 | -2.313644 | -1.493668 | -0.984360 |
| 54  | 6 | 0 | -3.094529 | -1.096269 | -2.074995 |
| 55  | 6 | 0 | -2.423812 | -0.277303 | -3.017835 |
| 56  | 6 | 0 | -3.103583 | 0.175079  | -4.147343 |
| 57  | 6 | 0 | -4.437135 | -0.192411 | -4.366208 |
| 58  | 6 | 0 | -5.100133 | -0.993162 | -3.438277 |
| 59  | 6 | 0 | -4.433346 | -1.432221 | -2.288432 |
| 60  | 7 | 0 | -1.085407 | -0.008162 | -2.683879 |
| 61  | 1 | 0 | 6.150124  | 2.089914  | 1.204864  |
| 62  | 1 | 0 | 4.413677  | 2.513002  | 1.016299  |
| 63  | 1 | 0 | 5.811570  | 1.713110  | -1.200025 |
| 64  | 1 | 0 | 4.167624  | 1.095474  | -0.902292 |
| 65  | 1 | 0 | 6.785811  | -0.372788 | -0.489837 |
| 66  | 1 | 0 | 5.186472  | -1.026490 | -0.876287 |
| 67  | 1 | 0 | 4.817640  | -1.388615 | 1.424698  |
| 68  | 1 | 0 | 6.402628  | -0.641993 | 1.792455  |
| 69  | 1 | 0 | 3.794285  | -3.238208 | 1.053814  |
| 70  | 1 | 0 | 4.778620  | -4.906452 | -0.505625 |
| 71  | 1 | 0 | 4.260664  | -4.808510 | -2.942530 |
| 72  | 1 | 0 | 2.644410  | -3.095373 | -3.785950 |
| 73  | 1 | 0 | 1.423442  | -1.209735 | 4.682788  |
| 74  | 1 | 0 | -0.091529 | -1.199744 | 6.661274  |
| 75  | 1 | 0 | -2.321841 | -0.098345 | 6.530068  |
| 76  | 1 | 0 | -3.063670 | 0.931134  | 4.370295  |
| 77  | 1 | 0 | -1.376252 | 5.210635  | 1.234753  |
| 78  | 1 | 0 | -3.714755 | 5.864974  | 1.800158  |
| 79  | 1 | 0 | -5.601047 | 4.324762  | 1.281425  |
| 80  | 1 | 0 | -5.137957 | 2.118118  | 0.202537  |
| 81  | 1 | 0 | 1.545179  | 4.005053  | -3.530339 |
| 82  | 1 | 0 | 2.692317  | 6.022876  | -2.592697 |
| 83  | 1 | 0 | 3.296709  | 6.070666  | -0.174616 |
| 84  | 1 | 0 | 2.862580  | 4.090563  | 1.267521  |
| 85  | 1 | 0 | -0.557853 | -5.422991 | -0.923210 |
| 86  | 1 | 0 | -2.327727 | -6.759799 | 0.218259  |
| 87  | 1 | 0 | -3.663137 | -5.738429 | 2.055614  |
| 88  | 1 | 0 | -3.221272 | -3.379910 | 2.746993  |
| 89  | 1 | 0 | -4.941596 | -2.058200 | -1.556058 |
| 90  | 1 | 0 | -6.136957 | -1.279262 | -3.603469 |
| 91  | 1 | 0 | -4.952510 | 0.152251  | -5.260460 |
| 92  | 1 | 0 | -2.580395 | 0.810005  | -4.861688 |
| 93  | 1 | 0 | -2.285215 | 1.657648  | 2.131800  |
| 94  | 1 | 0 | 1.370957  | -1.059242 | -3.186915 |
| 95  | 1 | 0 | 0.959350  | 1.651263  | -3.087675 |
| 96  | 1 | 0 | -1.571482 | -1.579420 | 2.607537  |
| 97  | 1 | 0 | 0.833604  | -3.395974 | -0.698501 |
| 98  | 1 | 0 | -2.694778 | -2.349286 | -0.583002 |
| 99  | 1 | 0 | -0.557890 | 0.245449  | -3.517070 |
| 100 | 1 | 0 | -3.404447 | 0.881452  | -1.073760 |
| 101 | 1 | 0 | -0.028716 | 3.593912  | -0.120220 |
